# Supplementary material
Source: Research Square preprint supplement (doi:10.21203/rs.3.rs-10344997/v1)
Supplement: Supplementary file 1 [file 94da69aefae07875d20b1597.docx]

***In vitro* activation of µ opioid receptor and cardiac voltage-gated potassium channels hERG and KV7.1/KCNE1 of orphine analogs and their detections in forensic casework**

Caitlyn Norman1,*, Nina E Ottosson2,3, Jenny Rosengren Holmberg4, Maria Norlund5, Evert J Homan6,7, Maria Wikström5, Robert Kronstrand1,5, Mattias Persson1,5,#, Henrik Green 1,5,8,#

1Division of Clinical Chemistry and Pharmacology, Department of Biomedical and Clinical Sciences, Linköping University, Linköping, Sweden

2Division of Cell and Neurobiology, Department of Biomedical and Clinical Sciences, Linköping University, Linköping, Sweden

3Chemical Biology Consortium Sweden, Science for Life Laboratory, Linköping University, Linköping, Sweden

4Chemistry section, National Forensic Centre, Linköping, Sweden

5Department of Forensic Genetics and Forensic Toxicology, National Board of Forensic Medicine, Linköping, Sweden

6Department of Medical Biochemistry and Biophysics, Karolinska Institutet, Stockholm, Sweden

7Chemical Biology Consortium Sweden, Science for Life Laboratory, Karolinska Institutet, Stockholm, Sweden

8Department of Biomedical and Clinical Sciences, Science for Life Laboratory, Linköping University, Linköping, Sweden

*Corresponding author: [caitlyn.norman@liu.se](mailto:caitlyn.norman@liu.se)

#Contributed equally to the study

**Supplementary Information**

**SECTION 1: Analytical data from first seizure of each orphine**

**SECTION 2: µ opioid receptor statistical analysis results**

**SECTION 3: hERG voltage dependence (ΔV50) data for all orphines**

**SECTION 4: hERG structure-activity relationships statistical analysis results**

**SECTION 5: *In silico* hERG molecular docking**

**SECTION 6: KV7.1/KCNE1 maximal conductance (Gmax) and voltage dependence (ΔV50) data for all orphines**

**SECTION 1**

**Analytical data from first seizure of each orphine**

The NMR assignments are according to the numbering in the structures above.

**Brorphine (1)**

*1H NMR:* δ (400 MHz; d6-DMSO), 10.81 (1H, br s, NH1), 7.53 (2H, d, H20, H22), 7.32 (2H, d, H19, H23), 7.20 (1H, m, H5), 6.98-6.95 (3H, m, H7, H8, H6), 4.06 (1H, m, H10), 3.55 (1H, q, H16), 3.06 (1H, m, H14b), 2.86 (1H, m, H12b), 2.36-2.27 (2H, m, H15b, H11b), 2.06 (1H, m, H14a), 1.98 (1H, m, H12a), 1.65 (1H, m, H15a), 1.59 (1H, m, H11a), 1.31 (3H, d, H17); *13C NMR* δ (100 MHz; d6-DMSO), 153.6 (C2), 143.0 (C18), 140.0 (C20, C22), 129.6 (C19, C23), 129.3 (C4), 128.2 (C9), 120.4 (C6), 120.3 (C7), 119.7 (C21), 108.7 (C8), 108.6 (C5), 62.5 (C16), 50.3 (C10), 49.7 (C12), 49.1 (C14), 28.9 (C15), 28.8 (C11), 18.7 (C17); *GC-MS: m/z* (EI), 399 (M+, 2%), 216 (10), 183 (6), 134 (6), 104 (25), 82 (100); *HR-LCMS*: *m/z* (HESI), 400.1016, C20H23BrN3O+, calculated 400.1024.

**Cychlorphine (2)**

*1H NMR:* δ (400 MHz; d6-DMSO), 7.73 (1H, d, H5), 7.70 (2H, d, H19, H23), 7.57 (2H, d, H20, H22), 7.33 (1H, d, H8), 7.07 (2H, quint, H6, H7), 4.56 (2H, m, H10, H16), 4.12 (2H, t, H24), 3.78 (1H, d, H14b), 3.35 (1H, m, H12b), 3.01-2.97 (2H, m, H14a, H15b), 2.94 (3H, m, H25, H12a), 2.80 (1H, m, H11b), 1.88-1.83 (2H, m, H11a, H15a), 1.74 (3H, d, H17); *13C NMR* δ (100 MHz; d6-DMSO), 152.5 (C2), 134.2 (C21), 133.7 (C18), 131.4 (C19, C23), 128.9 (C20, C22), 128.5 (C9), 127.4 (C4), 121.1 (C6, C7), 118.6 (C26), 109.6 (C5), 108.5 (C8), 63.9 (C16), 49.9 (C14), 47.7 (C12), 47.2 (C10), 36.4 (C24), 25.3 (C11,C15), 16.5 (C25), 16.4 (C17); *GC-MS: m/z* (EI), 408 (M+, 1%), 393 (3), 269 (11), 139 (11), 103 (16), 82 (100); *HR-LCMS*: *m/z* (HESI), 409.1787, C23H26ClN4O+, calculated 409.1795.

**Spirochlorphine (3)**

*1H NMR:* δ (400 MHz; d6-DMSO), 8.93 (1H br s, NH8), 7.74 (2H, d, H20, H24), 7.54 (2H, d, H21, H23), 7.20 (2H, t, H13, H15), 7.11 (2H, d, H12, H16), 6.77 (1H, t, H14), 4.59-4.58 (3H, m, H9, H17), 3.65 (1H, d, H6b), 3.53-3.42 (2H, m, H2b, H6a), 3.23 (1H, d, H2a), 3.12 (1H, m, H5b), 2.94 (1H, m, H3b), 1.84 (1H, d, H5a), 1.75 (4H, d, H3a, H18); *13C NMR* δ (100 MHz; d6-DMSO), 174.6 (C7), 142.7 (C11), 134.2 (C22), 133.9 (C19), 131.4 (C20, C24), 129.0 (C13, C15), 128.8 (C21, C23), 117.9 (C14), 114.3 (C12, C16), 64.1 (C17), 58.7 (C9), 56.6 (C4), 47.2 (C6), 44.7 (C2), 26.0 (C5), 25.9 (C3), 16.6 (C18); *GC-MS: m/z* (EI), 369 (M+, 3%), 354 (13), 230 (40), 175 (100), 139 (46), 125 (26), 103 (40), 77 (23), 56 (43); *HR-LCMS*: *m/z* (HESI), 370.1678, C21H25ClN3O+, calculated 370.1686.

**SECTION 2**

**µ opioid receptor statistical analysis results**

**Table S2.1.** Comparison of efficacy and potency between orphines and the reference fentanyl. P values are from Brown-Forsythe and Welch ANOVA tests with fentanyl as a reference.

| **Comparisons** | | **Efficacy (Emax)** | | | **Potency (logEC50)** | | |
| --- | --- | --- | --- | --- | --- | --- | --- |
| **Compound 1** | **Compound 2** | **Mean Diff** | **P value** | **Significant?** | **Mean Diff** | **P value** | **Significant?** |
| Fentanyl | Orphine | -2.404 | 0.2500 | No | -0.7387 | <0.0001 | Yes |
| Fluorphine | -1.171 | 0.9700 | No | -0.8889 | <0.0001 | Yes |
| Chlorphine | 0.3980 | >0.9999 | No | -0.5614 | <0.0001 | Yes |
| Brorphine | -0.7914 | 0.9875 | No | -0.3418 | <0.0001 | Yes |
| Iodorphine | -4.604 | 0.0111 | Yes | -0.6299 | <0.0001 | Yes |
| Cychlorphine (N-propionitrile chlorphine) | -1.922 | 0.4654 | No | 0.7244 | <0.0001 | Yes |
| Spirochlorphine (R6890) | -2.047 | 0.3813 | No | -0.1390 | 0.0370 | Yes |
| 5,6-dichloro desmethylchlorphine (SR-17018) | 2.135 | 0.4315 | No | -1.944 | <0.0001 | Yes |
| Spirobrorphine | -3.511 | 0.0553 | No | -0.3152 | 0.0002 | Yes |
| 5,6-dichloro brorphine | 0.9580 | 0.9695 | No | -0.6610 | <0.0001 | Yes |

**Table S2.2.** Comparison of efficacy and potency between halogen substitutions on the *N*-benzyl moiety of orphines. P values are from Brown-Forsythe and Welch ANOVA tests with fentanyl as a reference.

| **Structural comparison** | **Comparisons** | | **Efficacy (Emax)** | | | **Potency (EC50)** | | |
| --- | --- | --- | --- | --- | --- | --- | --- | --- |
| **Compound 1** | **Compound 2** | **Mean Diff** | **P value** | **Significant?** | **Mean Diff** | **P value** | **Significant?** |
| **H vs F** | Orphine | Fluorphine | 1.233 | 0.9230 | No | -0.1502 | 0.0403 | Yes |
| **H vs Cl** | Chlorphine | 2.802 | 0.1309 | No | 0.2342 | 0.0013 | Yes |
| **H vs Br** | Brorphine | 1.613 | 0.4346 | No | 0.3969 | <0.0001 | Yes |
| **H vs I** | Iodorphine | -2.200 | 0.1188 | No | 0.1088 | 0.0139 | Yes |
| **F vs Cl** | Fluorphine | Chlorphine | 1.569 | 0.8531 | No | 0.3844 | 0.0001 | Yes |
| **F vs Br** | Brorphine | 0.3792 | >0.9999 | No | 0.5471 | <0.0001 | Yes |
| **F vs I** | Iodorphine | -3.434 | 0.1230 | No | 0.2590 | 0.0021 | Yes |
| **Cl vs Br** | Chlorphine | Brorphine | -1.189 | 0.8667 | No | 0.1627 | 0.0089 | Yes |
| Spirochlorphine | Spirobrorphine | -1.464 | 0.2669 | No | -0.1762 | 0.0016 | Yes |
| **Cl vs I** | Chlorphine | Iodorphine | -5.002 | 0.0057 | Yes | -0.1254 | 0.0422 | Yes |
| **Br vs I** | Brorphine | Iodorphine | -3.813 | 0.0029 | Yes | -0.2881 | <0.0001 | Yes |

**Table S2.3.** Comparison of efficacy and potency between the other structural analogs of orphines. P values are from Brown-Forsythe and Welch ANOVA tests with fentanyl as a reference.

| **Comparisons** | | **Efficacy (Emax)** | | | **Potency (EC50)** | | |
| --- | --- | --- | --- | --- | --- | --- | --- |
| **Compound 1** | **Compound 2** | **Mean Diff** | **P value** | **Significant?** | **Mean Diff** | **P value** | **Significant?** |
| Chlorphine | Spirochlorphine | -2.445 | 0.0831 | No | 0.3655 | <0.0001 | Yes |
| Brorphine | Spirobrorphine | -2.719 | 0.0241 | Yes | 0.02658 | 0.7500 | No |
| Chlorphine | Cychlorphine | -2.320 | 0.1790 | No | 1.229 | <0.0001 | Yes |
| Chlorphine | 5,6-dichloro desmethylchlorphine | 1.737 | 0.4813 | No | -1.439 | <0.0001 | Yes |
| Brorphine | 5,6-dichloro brorphine | 1.749 | 0.1924 | No | -0.3192 | <0.0001 | Yes |

**SECTION 3**

**hERG voltage dependence (ΔV50) data for all orphines**

The concentration-response relationships for voltage dependence (ΔV50) effect for all 11 orphines tested are provided in Figure S3.1. The ΔV50 was not included for concentrations where the average Gmax (rel.) was less than 0.2. It can be clearly seen that only iodorphine had ΔV50 that was significantly different (mixed effects model, α = 0.05) from that of the vehicle (0.3% DMSO). The complete statistical data for comparison of the ΔV50 between orphines and run-specific vehicle (0.3% DMSO) controls are provided in Table S3.1.

**
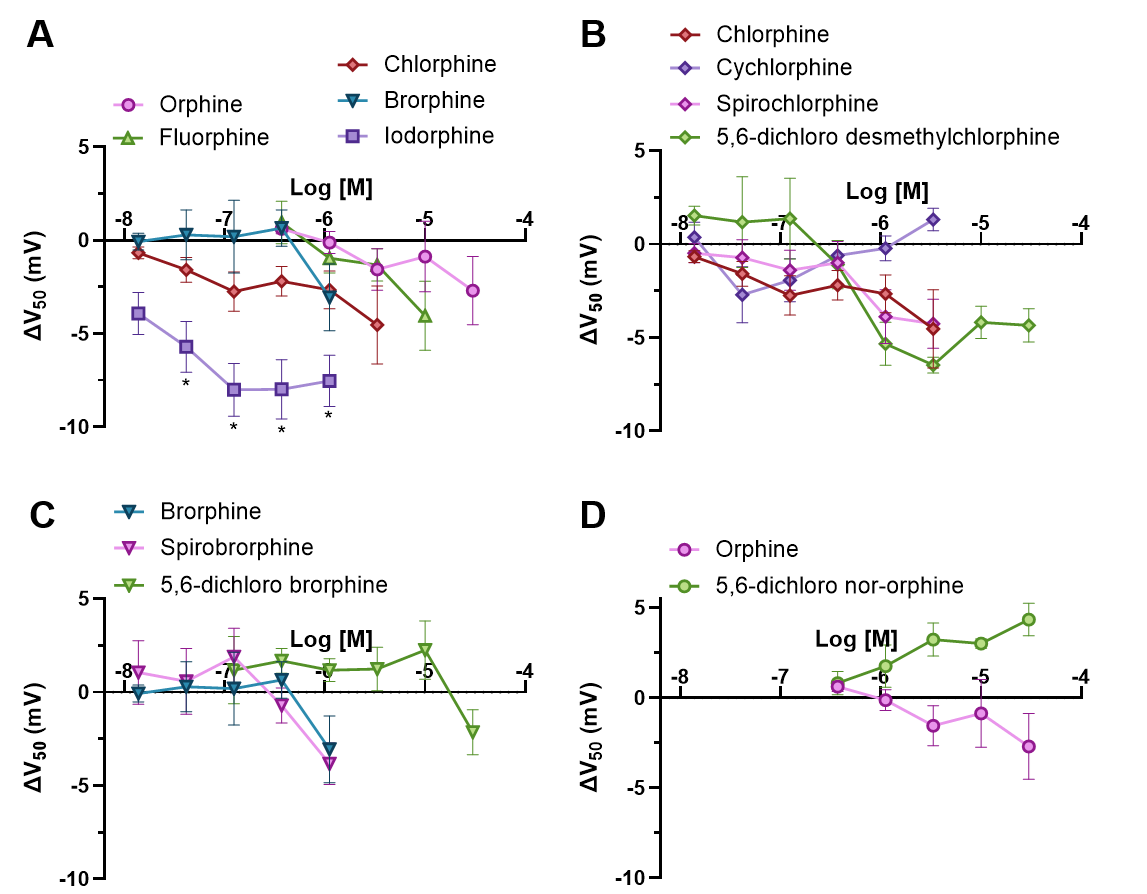
**

**Figure S3.1. Voltage dependence (ΔV50) effect of 11 orphines on hERG channel.** Concentration-response relationships for ΔV50 effect for **(A)** halogen-substituted analogs of orphine; **(B)** chlorphine analogs; **(C)** brorphine analogs; and **(D)** 5,6-dichloro nor-orphine, where n ≥ 5 for all orphines. The ΔV50 was not included for concentrations where the average Gmax (rel.) was less than 0.2. Error bars indicate SEM. *indicates that the ΔV50 is significantly different (mixed effects model, α = 0.05) from that of the vehicle (0.3% DMSO).

**Table S3.1.** Comparison of hERG voltage dependence (ΔV50) between orphines and run-specific vehicle (0.3% DMSO) controls. The mean difference (MD) is provided alongside the P values from a mixed effects model (full model fitted; assumed equal variability of differences) followed by Dunnett’s multiple comparisons test (α = 0.05). The ΔV50 was not included for concentrations where the average Gmax (rel.) was less than 0.2.

| **Compound** | **13.7 nM** | | **41.2 nM** | | **123 nM** | | **370 nM** | | **1.11 µM** | | **3.33 µM** | | **10 µM** | | **30 µM** | |
| --- | --- | --- | --- | --- | --- | --- | --- | --- | --- | --- | --- | --- | --- | --- | --- | --- |
| **MD** | **P** | **MD** | **P** | **MD** | **P** | **MD** | **P** | **MD** | **P** | **MD** | **P** | **MD** | **P** | **MD** | **P** |
| Orphine | - | - | - | - | - | - | -0.62 | >0.99 | 0.12 | >0.99 | 1.6 | >0.99 | 0.87 | >0.99 | - | - |
| Fluorphine | - | - | - | - | - | - | -1.1 | >0.99 | 0.77 | >0.99 | 1.3 | >0.99 | 4.0 | >0.99 | - | - |
| Chlorphine | 0.67 | >0.99 | 1.6 | 0.90 | 2.74 | 0.51 | 0.65 | >0.99 | 4.5 | >0.99 | - | - | - | - | - | - |
| Brorphine | 0.065 | >0.99 | -0.29 | >0.99 | 0.068 | >0.99 | 0.83 | >0.99 | 5.5 | 0.63 | - | - | - | - | - | - |
| Iodorphine | 3.9 | 0.21 | 5.7 | 0.028 | 8.004 | 0.0007 | 11 | <0.0001 | - | - | - | - | - | - | - | - |
| 5,6-dichloro nor-orphine | - | - | - | - | - | - | -0.97 | >0.99 | -1.9 | >0.99 | -3.2 | >0.99 | -3.0 | >0.99 | -4.3 | >0.99 |
| Cychlorphine | -0.37 | >0.99 | 2.7 | 0.56 | 1.9 | 0.82 | -0.35 | <0.99 | -0.65 | 0.99 | - | - | - | - | - | - |
| Spirochlorphine | 0.48 | >0.99 | 0.71 | >0.99 | 1.4 | 0.95 | 2.2 | >0.99 | 5.9 | 0.98 | - | - | - | - | - | - |
| 5,6-dichloro desmethylchlorphine | -1.5 | >0.99 | -1.2 | >0.99 | -1.1 | >0.99 | 4.4 | 0.89 | 6.5 | 0.64 | 6.5 | 0.66 | 4.2 | 0.93 | -0.79 | >0.99 |
| Spirobrorphine | -1.1 | >0.99 | -0.58 | >0.99 | -1.6 | >0.99 | 0.12 | >0.99 | - | - | - | - | - | - | - | - |
| 5,6-dichloro brorphine | - | - | - | - | -1.2 | >0.99 | -1.2 | 0.87 | -0.96 | 0.94 | 0.89 | 0.95 | 1.2 | 0.86 | 2.5 | 0.29 |

**SECTION 4**

**hERG structure-activity relationships statistical analysis results**

**Table S4.1.** Comparison of hERG maximal reduction at 10 µM and potency in channel conductance (Gmax) between halogen substitutions on the *N*-benzyl moiety of orphines. P values are from Brown-Forsythe and Welch ANOVA tests.

| **Structural comparison** | **Comparisons** | | **Max reduction at 10 µM in Gmax** | | | **Potency (IC50)** | | |
| --- | --- | --- | --- | --- | --- | --- | --- | --- |
| **Compound 1** | **Compound 2** | **Mean Diff** | **P value** | **Significant?** | **Mean Diff** | **P value** | **Significant?** |
| **H vs F** | Orphine | Fluorphine | 0.1100 | 0.1595 | No | 0.2852 | 0.9871 | No |
| **H vs Cl** | Chlorphine | 0.3150 | 0.0007 | Yes | 0.9545 | 0.0129 | Yes |
| **H vs Br** | Brorphine | 0.2580 | 0.0005 | Yes | 1.349 | 0.0022 | Yes |
| **H vs I** | Iodorphine | 0.3180 | 0.0003 | Yes | 1.648 | 0.0006 | Yes |
| **F vs Cl** | Fluorphine | Chlorphine | 0.2050 | 0.0065 | Yes | 0.6692 | 0.1968 | No |
| **F vs Br** | Brorphine | 0.1480 | 0.0489 | Yes | 1.064 | 0.0465 | Yes |
| **F vs I** | Iodorphine | 0.2080 | 0.0036 | Yes | 1.363 | 0.0431 | Yes |
| **Cl vs Br** | Chlorphine | Brorphine | -0.0570 | 0.6540 | No | 0.3946 | 0.0018 | Yes |
| Spirochlorphine | Spirobrorphine | -0.01500 | 0.0827 | No | 0.2449 | 0.0047 | Yes |
| **Cl vs I** | Chlorphine | Iodorphine | 0.0030 | >0.9999 | No | 0.6935 | <0.0001 | Yes |
| **Br vs I** | Brorphine | Iodorphine | 0.0600 | 0.6238 | No | 0.2990 | 0.0118 | Yes |

**Table S4.2.** Comparison of hERG maximal reduction at 10 µM and potency in channel conductance (Gmax) between the other structural analogs of orphines. P values are from Brown-Forsythe and Welch ANOVA tests.

| **Comparisons** | | **Max reduction at 10 µM in Gmax** | | | **Potency (IC50)** | | |
| --- | --- | --- | --- | --- | --- | --- | --- |
| **Compound 1** | **Compound 2** | **Mean Diff** | **P value** | **Significant?** | **Mean Diff** | **P value** | **Significant?** |
| Orphine | 5,6-dichloro nor-orphine | -0.5720 | <0.0001 | Yes | - | - | - |
| Chlorphine | Spirochlorphine | 0.01700 | 0.1361 | No | 0.08663 | 0.8339 | No |
| Brorphine | Spirobrorphine | 0.05900 | 0.3029 | No | -0.06308 | 0.7513 | No |
| Chlorphine | Cychlorphine | -0.00800 | 0.8801 | No | -0.06679 | 0.9038 | No |
| Chlorphine | 5,6-dichloro desmethylchlorphine | -0.2730 | 0.0562 | No | 0.3403 | 0.1110 | No |
| Brorphine | 5,6-dichloro brorphine | -0.7700 | <0.0001 | Yes | - | - | - |

**SECTION 5**

***In silico* hERG molecular docking**


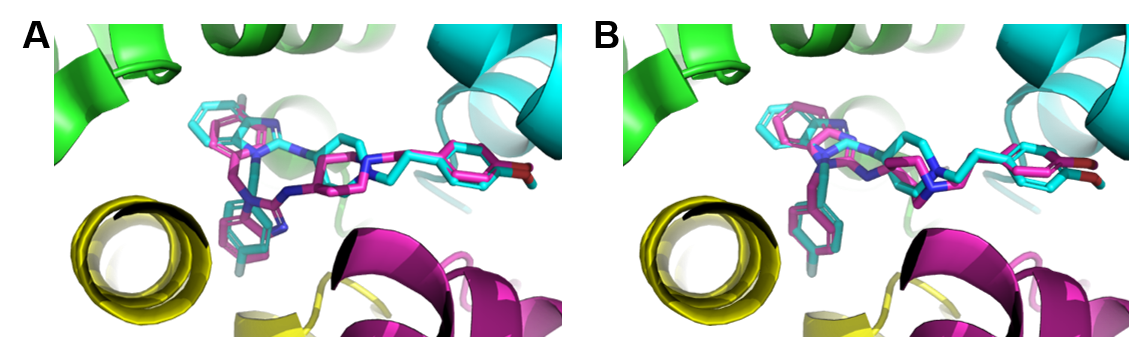


**Figure S5.1**. Overlays of hERG-bound astemizole as determined by cryo-EM (8ZYO.pdb, magenta sticks) and best-scoring GNINA CNN docking poses (cyan sticks) obtained with **(A)** astemizole_Model_1 and **(B)** astemizole_Model_2. hERG protein chains are rendered as cartoons and color-coded as follows: A, green; B, cyan; C, magenta; D, yellow.

**Table S5.1**. GNINA CNN_VS docking scores obtained for the ligands using astemizole_Model_1 and astemizole_Model_2 for molecular docking. For the chiral molecules (marked *), the values obtained for the individual enantiomers were averaged. hERG pIC50 values were derived from IC50 values reported in Table 2.

| **Compound** | **CNN_VS docking score** | | **hERG pIC50** |
| --- | --- | --- | --- |
| **Astemizole_Model_1** | **Astemizole_Model_2** |
| Astemizole | 8.43 | 8.32 | ND |
| Orphine* | 4.11 | 4.35 | 5.26 |
| Fluorphine* | 4.94 | 4.46 | 5.55 |
| Chlorphine* | 4.90 | 4.91 | 6.22 |
| Brorphine* | 5.24 | 5.49 | 6.61 |
| Iodorphine* | 5.43 | 5.52 | 6.91 |
| Spirochlorphine (R6890)* | 6.40 | 6.38 | 6.30 |
| Spirobrorphine* | 6.57 | 6.40 | 6.55 |
| 5,6-Dichloro nor-orphine | 5.14 | 5.10 | ND |
| Cychlorphine (*N*-propionitrile chlorphine)* | 6.40 | 6.35 | 6.15 |
| 5,6-Dichloro brorphine* | 5.93 | 6.03 | ND |
| 5,6-Dichloro desmethylchlorphine (SR-17018) | 6.73 | 6.55 | 7.00 |

Abbreviations: ND, not determined

**Table S5.2.** Raw docking scores and post-processing parameters of the GNINA docking poses obtained for the 11 orphines included in this study. Astemizole was included as an internal benchmark. minimizedAffinity: VINA score; CNNscore: GNINA predicted probability that the pose is good (<2 Å from correct); CNNaffinity: GNINA binding affinity prediction in pK units; CNN_VS: CNNaffinity*CNN_score; CNNaffinity_variance: uncertainty or confidence interval associated with the predicted binding affinity; MCS_RMSD: maximum common substructure root means square deviation between docking pose and reference ligand (Å); Shape_Sim: RDKit shape similarity between docking pose and reference ligand; Ref_Sim: RDKit ECFP2 Tanimoto similarity between docking pose and reference ligand; PB_Flags: PoseBusters flags for docking pose; PLIF_Sim: ProLIF protein-ligand interaction fingerprint similarity between docking pose and reference ligand.

| **Compound** | **minimizedAffinity** | **CNNscore** | **CNNaffinity** | **CNN_VS** | **CNNaffinity_variance** | **MCS_RMSD** | **Shape_Sim** | **Ref_Sim** | **PB_Flags** | **PLIF_Sim** |
| --- | --- | --- | --- | --- | --- | --- | --- | --- | --- | --- |
| Astemizole | -12.80 | 0.95 | 8.78 | 8.32 | 0.09 | 1.27 | 0.68 | 1.00 | 0.00 | 0.39 |
| (R)-Orphine | -9.85 | 0.64 | 7.20 | 4.64 | 0.20 | 9.62 | 0.34 | 0.21 | 1.00 | 0.40 |
| (S)-Orphine | -9.27 | 0.56 | 7.18 | 4.05 | 0.46 | 5.51 | 0.35 | 0.21 | 0.00 | 0.35 |
| (R)-Fluorphine | -10.44 | 0.72 | 7.46 | 5.35 | 0.17 | 9.33 | 0.35 | 0.26 | 1.00 | 0.32 |
| (S)-Fluorphine | -10.92 | 0.49 | 7.28 | 3.56 | 0.21 | 5.06 | 0.43 | 0.26 | 0.00 | 0.24 |
| (R)-Chlorphine | 7.42 | 0.66 | 6.99 | 4.62 | 0.64 | 6.93 | 0.29 | 0.20 | 1.00 | 0.28 |
| (S)-Chlorphine | -9.61 | 0.69 | 7.55 | 5.20 | 0.44 | 5.48 | 0.37 | 0.20 | 0.00 | 0.35 |
| (R)-Brorphine | -6.90 | 0.70 | 7.62 | 5.36 | 0.43 | 6.58 | 0.30 | 0.20 | 0.00 | 0.35 |
| (S)-Brorphine | -9.42 | 0.74 | 7.61 | 5.61 | 0.44 | 5.55 | 0.36 | 0.20 | 0.00 | 0.33 |
| (R)-Iodorphine | -9.97 | 0.71 | 7.63 | 5.39 | 0.20 | 7.64 | 0.43 | 0.20 | 0.00 | 0.38 |
| (S)-Iodorphine | -9.13 | 0.74 | 7.64 | 5.65 | 0.35 | 5.62 | 0.37 | 0.20 | 0.00 | 0.33 |
| (R)-Spirobrorphine | -9.75 | 0.89 | 7.77 | 6.94 | 0.13 | 6.07 | 0.38 | 0.14 | 1.00 | 0.28 |
| (S)-Spirobrorphine | -8.94 | 0.79 | 7.45 | 5.86 | 0.08 | 4.80 | 0.37 | 0.14 | 0.00 | 0.19 |
| (R)-Spirochlorphine | -9.75 | 0.89 | 7.73 | 6.86 | 0.12 | 5.98 | 0.38 | 0.14 | 1.00 | 0.24 |
| (S)-Spirochlorphine | -7.14 | 0.78 | 7.59 | 5.91 | 0.24 | 8.48 | 0.29 | 0.14 | 1.00 | 0.21 |
| 5,6-Dichloro nor-orphine | -8.71 | 0.75 | 6.78 | 5.10 | 0.27 | 2.66 | 0.30 | 0.13 | 0.00 | 0.25 |
| (R)-Cychlorphine | -9.41 | 0.80 | 8.09 | 6.48 | 0.18 | 6.21 | 0.32 | 0.22 | 0.00 | 0.25 |
| (S)-Cychlorphine | -9.54 | 0.77 | 8.04 | 6.21 | 0.15 | 5.18 | 0.43 | 0.22 | 0.00 | 0.20 |
| (R)-5,6-Dichloro brorphine | -9.84 | 0.72 | 8.05 | 5.82 | 0.08 | 8.28 | 0.39 | 0.17 | 1.00 | 0.40 |
| (S)-5,6-Dichloro brorphine | -11.21 | 0.75 | 8.30 | 6.23 | 0.12 | 8.90 | 0.40 | 0.17 | 1.00 | 0.39 |
| 5,6-Dichloro desmethylchlorphine | -11.17 | 0.81 | 8.07 | 6.55 | 0.07 | 9.06 | 0.40 | 0.23 | 1.00 | 0.42 |

**SECTION 6**

**KV7.1/KCNE1 maximal conductance (Gmax) and voltage dependence (ΔV50) data for all orphines**

**
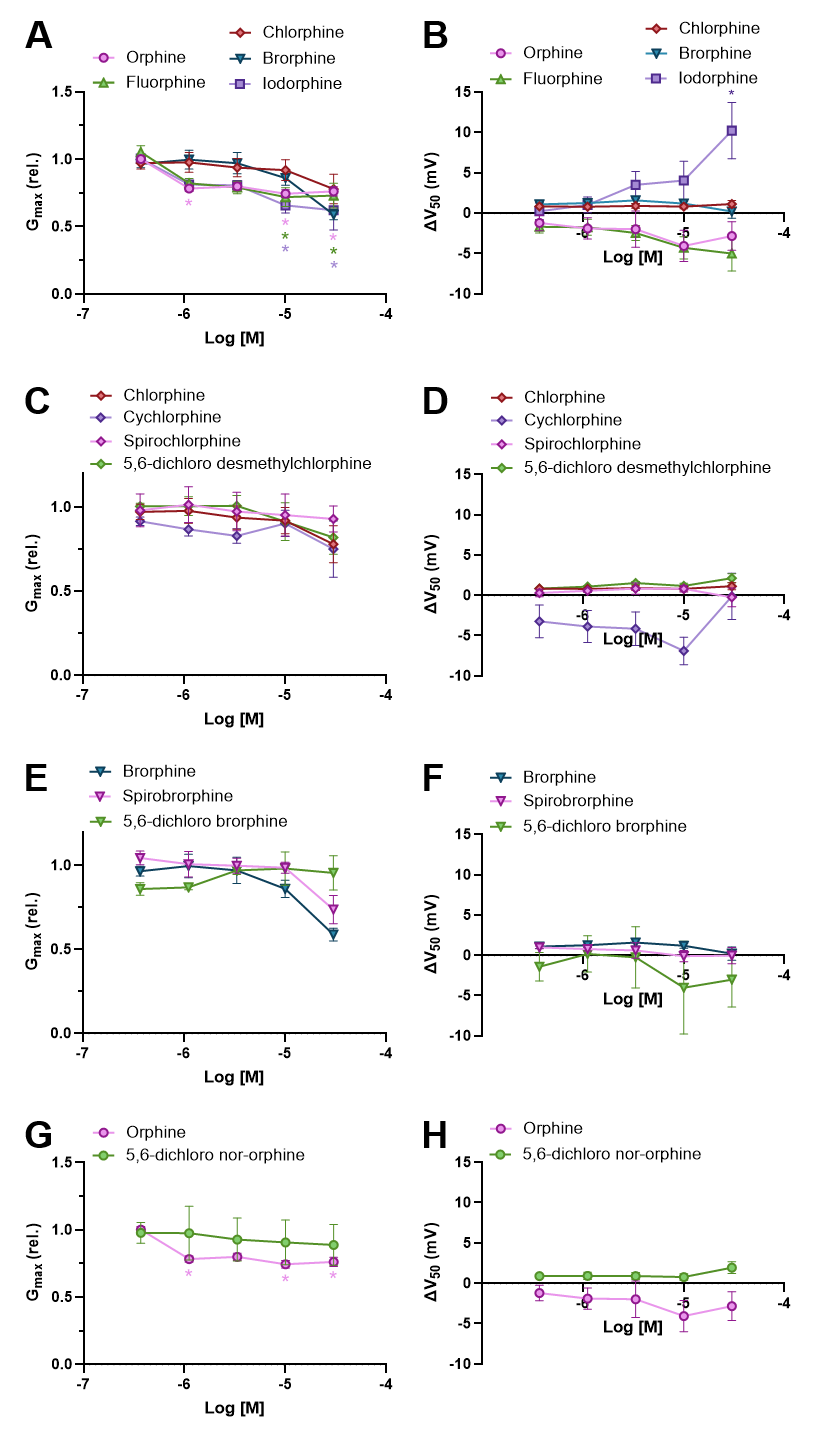
**

**Figure S6.1.** **Maximal channel conductance (Gmax) and voltage dependence (ΔV50) of 11 orphines on KV7.1/KCNE1 channel. (A, C, E, G)** Concentration-response curves for Gmax of (A) halogen-substituted analogs of orphine; (C) chlorphine analogs; (E) brorphine analogs; and (G) 5,6-dichloro nor-orphine. Nonlinear regressions could not be calculated for 5,6-dichloro brorphine and 5,6-dichloro nor-orphine as they did not reach saturation, so no curve is shown. *indicates that the Gmax or ΔV50 is significantly different (mixed effects model, α = 0.05) from that of the vehicle (0.3% DMSO). Error bars indicate standard error to the mean (SEM) and n ≥ 5.

**Table S6.1.** Comparison of KV7.1/KCNE1maximal channel conductance (Gmax) between orphines and run-specific vehicle (0.3% DMSO) controls. The mean difference (MD) is provided alongside the P values from a mixed effects model (full model fitted; assumed equal variability of differences) followed by Dunnett’s multiple comparisons test (α = 0.05).

| **Compound** | **370 nM** | | **1.11 µM** | | **3.33 µM** | | **10 µM** | | **30 µM** | |
| --- | --- | --- | --- | --- | --- | --- | --- | --- | --- | --- |
| **MD** | **P** | **MD** | **P** | **MD** | **P** | **MD** | **P** | **MD** | **P** |
| Orphine | -0.0021 | >0.99 | 0.22 | 0.029 | 0.19 | 0.080 | 0.25 | 0.0077 | 0.24 | 0.015 |
| Fluorphine | -0.053 | 0.89 | 0.18 | 0.096 | 0.20 | 0.062 | 0.28 | 0.0028 | 0.27 | 0.0056 |
| Chlorphine | 0.029 | >0.99 | 0.023 | >0.99 | 0.061 | >0.99 | 0.079 | 0.99 | 0.22 | 0.33 |
| Brorphine | 0.035 | >0.99 | -7.8e-5 | >0.99 | 0.027 | >0.99 | 0.14 | 0.86 | 0.41 | 0.0020 |
| Iodorphine | -0.0040 | >0.99 | 0.19 | 0.057 | 0.18 | 0.088 | 0.34 | <0.0001 | 0.39 | <0.0001 |
| 5,6-dichloro nor-orphine | 0.022 | >0.99 | 0.022 | >0.99 | 0.071 | >0.99 | 0.093 | 0.99 | 0.13 | 0.94 |
| Cychlorphine | 0.13 | 0.52 | 0.16 | 0.39 | 0.075 | 0.91 | 0.21 | 0.16 | 0.13 | 0.64 |
| Spirochlorphine | 0.020 | >0.99 | -0.014 | >0.99 | 0.025 | >0.99 | 0.046 | >0.99 | 0.094 | 0.98 |
| 5,6-dichloro desmethylchlorphine | -0.0046 | >0.99 | -0.0030 | >0.99 | -0.0033 | >0.99 | 0.090 | 0.98 | 0.18 | 0.54 |
| Spirobrorphine | -0.045 | >0.99 | -0.32 | 0.055 | -0.28 | 0.13 | -0.26 | 0.18 | -0.016 | >0.99 |
| 5,6-dichloro brorphine | 0.12 | 0.53 | 0.017 | >0.99 | -0.0017 | >0.99 | 0.037 | >0.99 | 0.058 | 0.98 |

**Table S6.2.** Comparison of KV7.1/KCNE1voltage dependence (ΔV50) between orphines and run-specific vehicle (0.3% DMSO) controls. The mean difference (MD) is provided alongside the P values from a mixed effects model (full model fitted; assumed equal variability of differences) followed by Dunnett’s multiple comparisons test (α = 0.05).

| **Compound** | **370 nM** | | **1.11 µM** | | **3.33 µM** | | **10 µM** | | **30 µM** | |
| --- | --- | --- | --- | --- | --- | --- | --- | --- | --- | --- |
| **MD** | **P** | **MD** | **P** | **MD** | **P** | **MD** | **P** | **MD** | **P** |
| Orphine | 1.4 | 0.93 | 1.9 | 0.84 | 2.0 | 0.82 | 4.1 | 0.26 | 3.0 | 0.56 |
| Fluorphine | 1.9 | 0.83 | 1.7 | 0.87 | 2.4 | 0.69 | 4.3 | 0.22 | 4.9 | 0.15 |
| Chlorphine | 0.24 | >0.99 | 0.19 | >0.99 | 0.099 | >0.99 | 0.17 | >0.99 | -0.14 | >0.99 |
| Brorphine | -0.099 | >0.99 | -0.26 | >0.99 | -0.58 | 0.96 | -0.19 | >0.99 | 0.79 | 0.84 |
| Iodorphine | -0.0057 | >0.99 | -1.0 | 0.97 | -3.2 | 0.43 | -5.1 | 0.22 | -10.3 | 0.0003 |
| 5,6-dichloro nor-orphine | 0.097 | >0.99 | 0.015 | >0.99 | 0.092 | >0.99 | 0.23 | >0.99 | -0.92 | 0.83 |
| Cychlorphine | 3.9 | 0.56 | 4.1 | 0.51 | 6.6 | 0.13 | -0.090 | >0.99 | 5.0 | 0.38 |
| Spirochlorphine | 0.71 | 0.86 | 0.43 | 0.99 | 0.17 | >0.99 | 0.18 | >0.99 | 1.2 | 0.38 |
| 5,6-dichloro desmethylchlorphine | 0.16 | >0.99 | -0.066 | >0.99 | -0.57 | 0.97 | -0.22 | >0.99 | -1.2 | 0.39 |
| Spirobrorphine | 0.0030 | >0.99 | 0.21 | >0.99 | 0.38 | >0.99 | 1.1 | 0.56 | 1.0 | 0.64 |
| 5,6-dichloro brorphine | -0.18 | >0.99 | 0.22 | >0.99 | 3.4 | 0.79 | 3.0 | 0.84 | 1.8 | 0.98 |
